# Supplementary material
Source: PubMed Central journal article supplement (PMC2909825)
Supplement: gzn056_1.pdf [file gzn056_1.pdf]

## Supplementary data

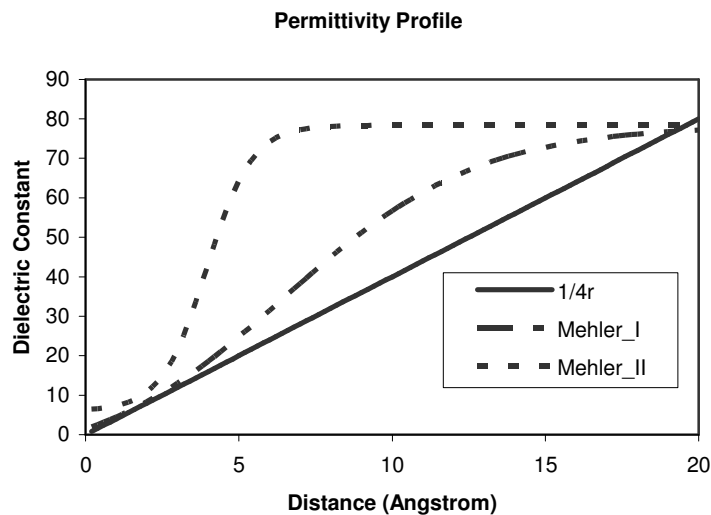

**Supplementary Figure 1.** The permittivity profiles for distance dependent dielectric constant ( $1/4r$ ) and two set of parameters of Mehler's model: Mehler\_I ( $A = 6.02944$ ,  $\lambda = 0.018733345$  and  $k = 213.5782$ ) and Mehler\_II ( $A = -8.5525$ ,  $\lambda = 0.003627$  and  $k = 7.7839$ ).

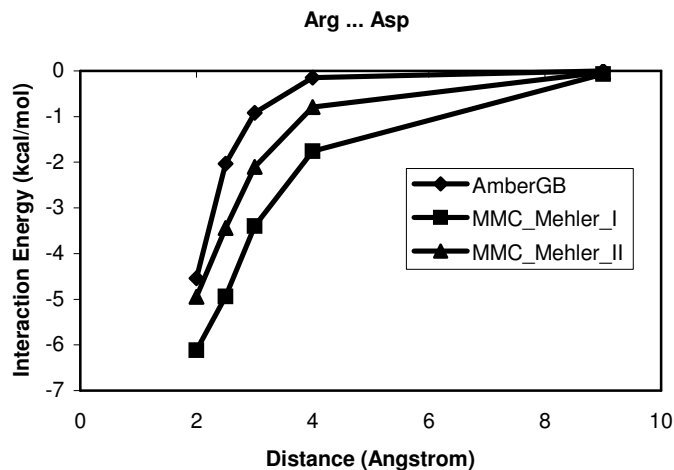

**Supplementary Figure 2.** The electrostatics interaction energies vs. distance between two charged residues (Arg and Asp) by using the Generalized Born (GB) model of Amber program, and two different sets of parameters for Mehler's model by using MMC program.

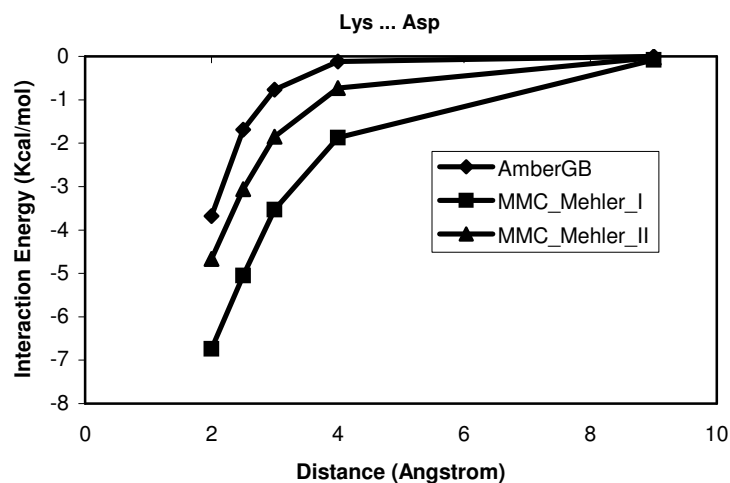

**Supplementary Figure 3.** The electrostatics interaction energies vs. distance between two charged residues (Lys and Asp) by using the Generalized Born (GB) model of Amber program, and two different sets of parameters for Mehler's model by using MMC program.

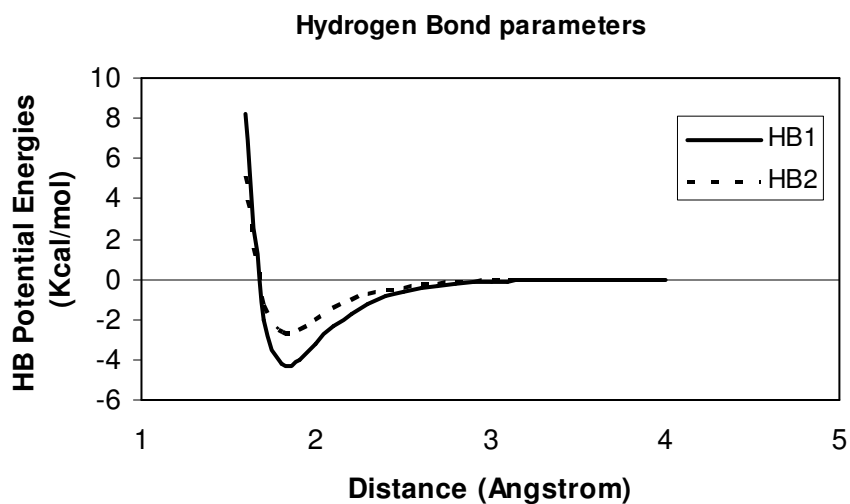

**Supplementary Figure 4.** Two type's hydrogen bonds are considered: backbone ( $C_{12}/C_{10}$  are 29513.0/10628.0), and side chains ( $C_{12}/C_{10}$  are 18444.0/6642.0, no HB energy terms are added for salt bridges).

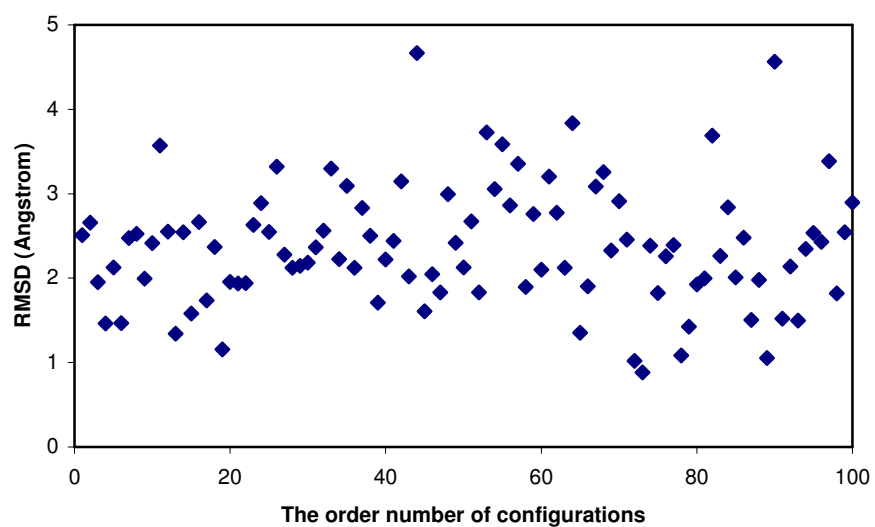

**Supplementary Figure 5.** The RMSD difference of predicted loop configurations of 8tln (248-255) before and after LMMC simulated annealing (**Figures 3 and 4**).

**Supplementary Table 1.** The average RMSD (in Å) difference of predicted loop configurations before and after LLMC simulated annealing, and the correlation coefficients of total energies vs. RMSD.

| PDB Code | Loop      | Length | RMSD_AVE | Correlation Coefficient |
|----------|-----------|--------|----------|-------------------------|
| 2apr     | 76-83     | 8      | 2.61     | 0.505                   |
| 8abp     | 203-208   | 6      | 1.84     | 0.211                   |
| 2act*    | 198-205   | 8      | 2.39     | 0.233                   |
| 8tln*    | E32-E38   | 7      | 2.53     | 0.166                   |
| 3grs*    | 83-89     | 7      | 2.99     | 0.222                   |
| 5cpa     | 231-237   | 7      | 2.40     | 0.073                   |
| 2fb4*    | H26-H32   | 7      | 2.27     | 0.020                   |
| 2fbj*    | H100-H106 | 7      | 1.85     | 0.186                   |
| 8tln*    | E248-E255 | 8      | 2.37     | 0.257                   |
| 3sgb     | E199-E211 | 9      | 1.57     | 0.488                   |
| 3dfr     | 20-23     | 4      | 1.57     | 0.285                   |
| 3dfr     | 89-93     | 5      | 1.27     | 0.588                   |
| 3dfr     | 120-124   | 5      | 2.17     | 0.442                   |
| 3blm     | 131-135   | 5      | 1.57     | 0.587                   |
